# Supplementary material for: Model Calculations of Aerosol Transmission and Infection Risk of COVID-19 in Indoor Environments
Source: Int J Environ Res Public Health. 2020 Nov 3;17(21):8114. doi: 10.3390/ijerph17218114 (PMC7662582; doi:10.3390/ijerph17218114)
Supplement: Supplementary file 1 [file ijerph-17-08114-s001.xlsx]

## Sheet: Tabelle1
				scenario A	scenario B	scenario C	scenario D	scenario E
#RNA for 50% infection probability (D50)	316		room ventilation rate [/h]	0.35	2	2	2	9
deposition probability	0.5		total mask efficiency (exhaling + inhaling)	0	0	0.7	0.95	0
emission breathing [/cm³]	0.06		susceptible # persons / room	24	24	24	24	24
emission speaking [/cm³]	0.6
speaking / breathing ratio	0.1
respiratory rate [l/min]	10		specific results	don't edit!	don't edit!	don't edit!	don't edit!	don't edit!
respiratory fluid RNA conc [/cm³]	500000000
mean wet aerosol diameter [um]	5		dosis 6 hours (per day)*	23.8574	8.6483	2.59449	0.432415	2.33451
infectious episode [d] *	2		dosis infectious episode	47.7148	17.2966	5.18898	0.86483	4.66902
virus lifetime in aerosol [h]	1.7		infection risk of individual person [% / episode]	9.93716	3.72295	1.13175	0.189521	1.01893
			risk of 1 person in room being infected [% / episode]	91.8886	59.7703	23.9036	4.45074	21.7919
room area [m²]**	60
room height [m]**	3
** Very large room sizes violate the assumption of instantaneaous mixing of the air			* Episode can be adjusted in A11 plus the number of hours exposed (E10-I10)
normalized results, RVR = 1 / h	don't edit!
			Copyright
infection probability [/RNA]	0.0021911		Max Planck Institute for Chemistry
RNA content in aerosol	0.0327249		Hahn-Meitner-Weg 1
aerosol emission [/h]	68400		55128 Mainz
aerosol conc [/l]	0.38
RNA cont. aerosol conc [/l]	0.0124355
RNA dosis [/h]	3.73064
